# Supplementary material for: High glucose enhances the metastatic potential of tongue squamous cell carcinoma via the PKM2 pathway
Source: PubMed Central journal article supplement (PMC5762358; doi:10.18632/oncotarget.22907), 2017-12-04
Supplement: oncotarget-08-111770-s001.pdf [file oncotarget-08-111770-s001.pdf]

## High glucose enhances the metastatic potential of tongue squamous cell carcinoma via the PKM2 pathway

### SUPPLEMENTARY MATERIALS

Supplementary Table 1: The relationship between DM and the clinicopathological characteristics of TSCC patients

| Characteristics       | DM | non-DM | $\chi^2$ | P value |
|-----------------------|----|--------|----------|---------|
| Gender                |    |        |          |         |
| Male                  | 32 | 254    | 4.295    | 0.038   |
| Female                | 38 | 177    |          |         |
| Age (years)           |    |        |          |         |
| $\leq 40$             | 11 | 75     | 0.121    | 0.728   |
| $> 40$                | 59 | 356    |          |         |
| Tumour size           |    |        |          |         |
| T <sub>1+2</sub>      | 58 | 343    | 0.404    | 0.525   |
| T <sub>3+4</sub>      | 12 | 88     |          |         |
| Lymph node metastasis |    |        |          |         |
| Negative              | 49 | 325    | 0.930    | 0.335   |
| Positive              | 21 | 106    |          |         |
| Clinical stage        |    |        |          |         |
| C <sub>I+II</sub>     | 43 | 285    | 0.588    | 0.443   |
| C <sub>III+IV</sub>   | 27 | 146    |          |         |
| Histological grade    |    |        |          |         |
| Well                  | 36 | 234    | 0.199    | 0.656   |
| Moderate/Poor         | 34 | 197    |          |         |

Supplementary Table 2: Correlations between PKM2 expression and DM were tested using Spearman's rank correlation

|                 | DM       |         |
|-----------------|----------|---------|
|                 | <i>r</i> | P value |
| PKM2 expression | 0.188    | 0.025   |

**Supplementary Table 3: Correlations between DM and lymph node metastasis were tested using Spearman's rank correlation**

|                       | DM    |         |
|-----------------------|-------|---------|
|                       | r     | P value |
| lymph node metastasis | 0.043 | 0.336   |

**Supplementary Table 4: Clinicopathological characteristics of patients with TSCC**

|                             | Cohort #1* | Cohort #2  | Cohort #3  |
|-----------------------------|------------|------------|------------|
|                             | TSCC       | TSCC       | TSCC       |
| Gender                      |            |            |            |
| Male: n (%)                 | 47(52.81)  | 89(64.96)  | 148(53.82) |
| Female: n (%)               | 42(47.19)  | 48(35.04)  | 127(46.18) |
| Age                         |            |            |            |
| Median (range)              | 46(21-77)  | 57(27-84)  | 53(24-77)  |
| Tumour size                 |            |            |            |
| T <sub>1+2</sub> : n (%)    | 63(70.79)  | 100(72.99) | 232(84.36) |
| T <sub>3+4</sub> : n (%)    | 26(29.21)  | 37(27.01)  | 43(15.64)  |
| Lymph node metastasis       |            |            |            |
| Negative: n (%)             | 54(60.67)  | 93(67.88)  | 216(78.55) |
| Positive: n (%)             | 35(39.33)  | 44(32.12)  | 59(21.45)  |
| Clinical stage              |            |            |            |
| C <sub>I+II</sub> : n (%)   | 47(52.81)  | 80(58.39)  | 192(69.82) |
| C <sub>III+IV</sub> : n (%) | 42(47.19)  | 57(41.61)  | 83(30.18)  |
| Histological grade          |            |            |            |
| Well: n (%)                 | 52(58.43)  | 59(43.07)  | 161(58.55) |
| Moderate/Poor: n (%)        | 37(41.57)  | 78(56.93)  | 114(41.45) |

\*Cohort #1 was used in our previous study [28, 35].
